# Supplementary material
Source: publisher figshare collection journal article supplement (https://frontiersin.figshare.com/ndownloader/files/19072169)
Supplement: Supplementary file 1 [file 19072169]

## Sheet: Astrea 2(A)
CYCLE 4 START
Tile Name	Location	Photo #	Corals	Polyps	Zoox Score	Algae	CCA	Health	Area (cm^2)
ACER BU 12-8	3	100-1316	3	9	3	0	10	2 ok	0.117
ACER BU 9-46	4	100-1317	3	17	3	0	40	Good	0.182
ACER BU 9-39	2	100-1315	1	6	3	0	0	Good	0.061
ACER BU 14-37	7	100-1320	3	26	3	0	10	Good	0.309
ACER BU 13-40	8	100-1321	3	14	3	0	0	1 ok	0.158
			13	72	3				0.827
ACER UM 5-23	9	100-1322	4	30	3	0	10	Good	0.346
ACER UM 8-55	10	100-1323	3	15	3	0	0	Good	0.141
ACER UM 5-57	6	100-1319	4	22	3	0	0	Good	0.179
ACER UM 7-41	1	100-1314	4	28	3	0	0	Good	0.293
ACER UM 7-11	5	100-1318	4	33	3	0	0	Good	0.366
			19	128	3				1.325			Snails
Totals			32	200	3	0	7		2.152			31
CYCLE 4 END
Tile Name	Location	Photo #	Corals	Polyps	Zoox Score	Algae	CCA	Health	Area (cm^2)	Clean Time (sec)
ACER BU 12-8	3	100-1484	3	16	3	0		Good	0.19	170
ACER BU 9-46	4	100-1485	3	27	3	0		Good	0.333	152
ACER BU 9-39	2	100-1483	1	8	3	0		Good	0.142	74
ACER BU 14-37	7	100-1488	3	46	3	0		Good	0.678	212
ACER BU 13-40	8	100-1489	3	21	3	0		Good	0.332	233
			13	118	3				1.675	841
ACER UM 5-23	9	100-1490	4	39	3	0		Good	0.541	264
ACER UM 8-55	10	100-1491	3	19	3	0		Good	0.23	229
ACER UM 5-57	6	100-1487	4	24	3	0		Good	0.298	172
ACER UM 7-41	1	100-1482	4	40	3	0		Good	0.684	149
ACER UM 7-11	5	100-1486	4	45	3	0		Good	0.742	248
			19	167	3				2.495	1062		Snails
Totals			32	285	3	0			4.17	1903		26

## Sheet: Control 3(B)
CYCLE 4 START
Tile Name	Location	Photo #	Corals	Polyps	Zoox Score	Algae	CCA	Health	Area (cm^2)
ACER BU 9-18	8	100-1241	2	2	3	0	50	1 dead	0.038
ACER BU 14-24	9	100-1242	4	16	3	0	100	Good	0.103
ACER BU 9-9	10	100-1243	1	3	3	0	100	1 dead, 1 ok	0.041
ACER BU 9-52	1	100-1234	1	7	3	0	100	Chimera	0.086
ACER BU 13-16	2	100-1235	3	6	3	0	60	Good	0.072
			11	34	3				0.34
ACER UM 7-24	4	100-1237	2	3	2.5	0	70	2 dead, 1 ok	0.033
ACER UM 5-9	5	100-1238	2	9	3	0	100	good	0.07
ACER UM 6-62	7	100-1240	4	5	3	0	80	Good	0.054
ACER UM 5-16	3	100-1236	3	8	3	0	40	Chimera	0.074
ACER UM 5-64	6	100-1239	3	6	3	0	90	Good	0.064
			14	31	2.9				0.295			Snails
Totals			25	65	2.95	0	79		0.635			0
CYCLE 4 END
Tile Name	Location	Photo #	Corals	Polyps	Zoox Score	Algae	CCA	Health	Area (cm^2)	Clean Time (sec)
ACER BU 9-18	8	100-1499	2	4	3	30		Good	0.039	222
ACER BU 14-24	9	100-1500	4	11	3	80		Good	0.124	392
ACER BU 9-9	10	100-1501	1	7	3	70		Good	0.091	203
ACER BU 9-52	1	100-1492	1	11	3	20		Chimera	0.132	253
ACER BU 13-16	2	100-1493	3	14	3	20		Good	0.102	249
			11	47	3				0.488	1319
ACER UM 7-24	4	100-1495	2	6	2.67	10		1 in poor health	0.049	248
ACER UM 5-9	5	100-1496	2	12	3	80		Good	0.094	258
ACER UM 6-62	7	100-1498	4	3	3	30		Good	0.048	127
ACER UM 5-16	3	100-1494	3	7	2	50		Chimera	0.081	272
ACER UM 5-64	6	100-1497	3	6	2.67	100		1 in poor health	0.066	259
			14	34	2.668				0.338	1164		Snails
Totals			25	81	2.834	49			0.826	2483		0

## Sheet: Astrea 3(C)
CYCLE 4 START
Tile Name	Location	Photo #	Corals	Polyps	Zoox Score	Algae	CCA	Health	Area (cm^2)
ACER BU 9-1	10	100-1253	2	10	3	0	60	2 touching	0.135
ACER BU 12-32	5	100-1248	3	17	3	0	80	1 in poor health	0.153
ACER BU 13-13	4	100-1247	2	6	3	0	80	Good	0.042
ACER BU 9-31	1	100-1244	3	25	3	0	80	2 touching	0.209
ACER BU 9-20	7	100-1250	4	20	3	0	80	1 in poor health	0.132
			14	78	3				0.671
ACER UM 8-11	6	100-1249	2	7	3	0	80	1 in poor health	0.041
ACER UM 6-37	8	100-1251	1	8	3	0	40	2 touching	0.049
ACER UM 6-13	9	100-1252	2	12	3	0	20	Good	0.107
ACER UM 6-1	2	100-1245	3	27	3	0	80	2 touching	0.128
ACER UM 6-67	3	100-1246	1	6	3	0	80	1 dead	0.017
			9	60	3				0.342			Snails
Totals			23	138	3	0	68		1.013			43
CYCLE 4 END
Tile Name	Location	Photo #	Corals	Polyps	Zoox Score	Algae	CCA	Health	Area (cm^2)	Clean Time (sec)
ACER BU 9-1	10	100-1511	2	17	3	0		Good/Chimera	0.188	214
ACER BU 12-32	5	100-1506	3	19	3	0		1 in poor health	0.187	149
ACER BU 13-13	4	100-1505	2	8	3	0		1 in poor health	0.039	134
ACER BU 9-31	1	100-1502	3	31	3	0		Good/Chimera	0.334	196
ACER BU 9-20	7	100-1508	4	24	3	0		Good/Chimera	0.187	218
			14	99	3				0.935	911
ACER UM 8-11	6	100-1507	2	6	3	0		1 in poor health	0.027	155
ACER UM 6-37	8	100-1509	1	10	3	0		Good/Chimera	0.087	83
ACER UM 6-13	9	100-1510	2	19	3	0		Good	0.187	208
ACER UM 6-1	2	100-1503	3	25	3	0		Good	0.175	240
ACER UM 6-67	3	100-1504	1	3	3	0		1 in poor health	0.011	104
			9	63	3				0.487	790		Snails
Totals			23	162	3	0			1.422	1701		41

## Sheet: Control 1(D)
CYCLE 4 START
Tile Name	Location	Photo #	Corals	Polyps	Zoox Score	Algae	CCA	Health	Area (cm^2)
ACER BU 13-33	10	100-1263	3	5	2	0	100	1 dead, 3 ok	0.063
ACER BU 12-22	7	100-1260	3	3	2	0	100	3 ok	0.04
ACER BU 9-23	9	100-1262	3	4	2.33	0	100	2 ok	0.048
ACER BU 12-1	1	100-1254	3	7	3	0	90	1 dead, 3 ok	0.063
ACER BU 14-5	4	100-1257	1	2	2	0	40	1 dead, 1 ok	0.015
			13	21	2.266				0.229
ACER UM 6-33	2	100-1255	3	3	2	0	100	1 dead, 3 ok	0.052
ACER UM 7-26	8	100-1261	4	6	2.5	0	100	2 ok	0.079
ACER UM 5-38	5	100-1258	3	3	2	0	100	3 ok	0.037
ACER UM 8-30	6	100-1259	2	2	2	0	90	2 ok	0.031
ACER UM 5-58	3	100-1256	3	3	2	0	30	3 ok	0.048
			15	17	2.1				0.247			Snails
Totals			28	38	2.183	0	85		0.476			0
CYCLE 4 END
Tile Name	Location	Photo #	Corals	Polyps	Zoox Score	Algae	CCA	Health	Area (cm^2)	Clean Time (sec)
ACER BU 13-33	10	100-1521	3	5	2	100		3 ok	0.07	313
ACER BU 12-22	7	100-1518	3	2	3	100		Good	0.034	266
ACER BU 9-23	9	100-1520	3	5	3	100		Good	0.083	259
ACER BU 12-1	1	100-1512	3	6	2.75	100		1 ok	0.076	250
ACER BU 14-5	4	100-1515	1	1	2	100		1 ok	0.017	271
			13	19	2.55				0.28	1359
ACER UM 6-33	2	100-1513	3	4	2	100		3 ok	0.059	343
ACER UM 7-26	8	100-1519	4	5	3	100		Good	0.087	254
ACER UM 5-38	5	100-1516	3	3	3	100		Good	0.04	288
ACER UM 8-30	6	100-1517	2	2	2	100		2 ok	0.03	178
ACER UM 5-58	3	100-1514	3	23	2	100		3 ok	0.036	262
			15	37	2.4				0.316	1621		Snails
Totals			28	56	2.475	100			0.596	2980		0

## Sheet: Control 2(E)
CYCLE 4 START
Tile Name	Location	Photo #	Corals	Polyps	Zoox Score	Algae	CCA	Health	Area (cm^2)
ACER BU 13-34	7	100-1270	3	5	2	0	100	1 dead, 3 ok	0.057
ACER BU 12-12	9	100-1272	1	1	2	0	50	2 dead, 1 ok	0.012
ACER BU 10-1	4	100-1267	2	3	3	0	100	Good	0.038
ACER BU 10-23	6	100-1269	4	7	2	0	100	4 ok	0.06
ACER BU 13-25	8	100-1271	3	4	2	0	100	1 dead, 3 ok	0.038
			13	20	2.2				0.205
ACER UM 5-56	10	100-1273	4	4	2	0	100	4 ok	0.055
ACER UM 5-15	1	100-1264	3	4	2.333	0	100	3 ok	0.046
ACER UM 5-66	5	100-1268	3	9	2.333	0	30	2 ok	0.078
ACER UM 8-13	2	100-1265	2	6	2	0	100	2 ok	0.049
ACER UM BB-27	3	100-1266	1	2	2	0	30	2 dead, 1 ok	0.013
			13	25	2.1332				0.218			Snails
Totals			26	45	2.1666	0	81		0.423			0
CYCLE 4 END
Tile Name	Location	Photo #	Corals	Polyps	Zoox Score	Algae	CCA	Health	Area (cm^2)	Clean Time (sec)
ACER BU 13-34	7	100-1528	3	5	2	100		3 ok	0.027	229
ACER BU 12-12	9	100-1530	1	2	3	100		Good	0.01	168
ACER BU 10-1	4	100-1525	2	3	3	100		Good	0.032	332
ACER BU 10-23	6	100-1527	4	4	2	100		4 ok	0.038	385
ACER BU 13-25	8	100-1529	3	3	2	100		3 ok	0.014	209
			13	17	2.4				0.121	1323
ACER UM 5-56	10	100-1531	4	4	2	100		4 ok	0.045	335
ACER UM 5-15	1	100-1522	3	3	2.67	100		1 ok	0.055	291
ACER UM 5-66	5	100-1526	3	3	3	100		Good	0.071	344
ACER UM 8-13	2	100-1523	2	5	3	100		Good	0.046	248
ACER UM BB-27	3	100-1524	1	1	2	100		1 ok	0.011	208
			13	16	2.534				0.228	1426		Snails
Totals			26	33	2.467	100			0.349	2749		0

## Sheet: Batillaria 1(F)
CYCLE 4 START
Tile Name	Location	Photo #	Corals	Polyps	Zoox Score	Algae	CCA	Health	Area (cm^2)
ACER BU 13-26	4	100-1277	1	4	3	0	70	2 dead	0.03
ACER BU 9-36	1	100-1274	3	12	3	0	80	Good	0.093
ACER BU 14-34	7	100-1280	2	11	3	0	100	2 dead	0.089
ACER BU 9-40	9	100-1282	2	10	3	0	100	Good	0.058
ACER BU 9-48	10	100-1283	0	0		0	100	All dead	0
			8	37	3				0.27
ACER UM 6-15	5	100-1278	2	4	3	0	90	1 dead	0.026
ACER UM 7-18	6	100-1279	4	18	3	0	100	1 ok	0.162
ACER UM 5-47	2	100-1275	3	4	3	0	100	Good	0.036
ACER UM 6-72	8	100-1281	2	6	3	0	100	1 dead	0.03
ACER UM 5-54	3	100-1276	4	14	3	0	60	Good	0.107
			15	46	3				0.361			Snails
Totals			23	83	3	0	90		0.631			45
CYCLE 4 END
Tile Name	Location	Photo #	Corals	Polyps	Zoox Score	Algae	CCA	Health	Area (cm^2)	Clean Time (sec)
ACER BU 13-26	4	100-1535	1	5	3	0		Good	0.063	61
ACER BU 9-36	1	100-1532	3	18	3	0		Good	0.131	152
ACER BU 14-34	7	100-1538	2	15	3	0		Good	0.132	144
ACER BU 9-40	9	100-1540	2	9	3	0		Good	0.069	83
ACER BU 9-48	10	100-1541	0	0	3	0		All dead	0	0
			8	47	3				0.395	440
ACER UM 6-15	5	100-1536	1	3	3	0		1 dead	0.027	59
ACER UM 7-18	6	100-1537	4	26	3	0		Good	0.232	140
ACER UM 5-47	2	100-1533	3	6	3	0		2 ok	0.035	187
ACER UM 6-72	8	100-1539	2	6	3	0		Good	0.027	103
ACER UM 5-54	3	100-1534	4	24	3	0		Good	0.151	235
			14	65	3				0.472	724		Snails
Totals			22	112	3	0			0.867	1164		41

## Sheet: Astrea 1(G)
CYCLE 4 START
Tile Name	Location	Photo #	Corals	Polyps	Zoox Score	Algae	CCA	Health	Area (cm^2)
ACER BU 14-2	3	100-1286	3	17	3	0	90	good	0.127
ACER BU 14-38	10	100-1293	1	3	3	0	30	2 dead	0.033
ACER BU 9-30	7	100-1290	2	11	3	0	80	good	0.096
ACER BU 14-40	5	100-1288	2	12	3	0	60	good	0.096
ACER BU 9-37	8	100-1291	2	14	3	0	90	good	0.1
			10	57	3				0.452
ACER UM 8-48	4	100-1287	3	15	3	0	40	good	0.106
ACER UM 8-29	6	100-1289	2	15	3	0	90	chimera	0.183
ACER UM 5-12	2	100-1285	3	12	3	0	90	good	0.082
ACER UM BB-26	9	100-1292	3	12	3	0	60	good	0.092
ACER UM 6-4	1	100-1284	3	19	3	0	90	good	0.126
			14	73	3				0.589			Snails
Totals			24	130	3	0	72		1.041			38
CYCLE 4 END
Tile Name	Location	Photo #	Corals	Polyps	Zoox Score	Algae	CCA	Health	Area (cm^2)	Clean Time (sec)
ACER BU 14-2	3	100-1544	3	21	3	0		good/2 touching	0.153	71
ACER BU 14-38	10	100-1551	1	6	3	0		good	0.046	61
ACER BU 9-30	7	100-1548	2	14	3	0		good	0.184	116
ACER BU 14-40	5	100-1546	2	15	3	0		good	0.128	77
ACER BU 9-37	8	100-1549	2	17	3	0		good	0.182	86
			10	73	3				0.693	411
ACER UM 8-48	4	100-1545	3	22	3	0		good	0.175	121
ACER UM 8-29	6	100-1547	2	26	3	0		good/Chimera	0.357	80
ACER UM 5-12	2	100-1543	3	20	3	0		good	0.14	123
ACER UM BB-26	9	100-1550	3	22	3	0		good	0.164	98
ACER UM 6-4	1	100-1542	3	21	3	0		good	0.201	90
			14	111	3				1.037	512		Snails
Totals			24	184	3	0			1.73	923		36

## Sheet: Batillaria 2(H)
CYCLE 4 START
Tile Name	Location	Photo #	Corals	Polyps	Zoox Score	Algae	CCA	Health	Area (cm^2)
ACER BU 14-45	10	100-1303	3	8	3	0	80	2 touching	0.091
ACER BU 13-14	3	100-1296	4	9	3	0	90	1 ok	0.083
ACER BU 14-47	8	100-1301	3	10	3	0	100	Good	0.087
ACER BU 9-42	1	100-1294	2	5	3	0	90	1 dead, 1 ok	0.028
ACER BU 11-11	7	100-1300	2	4	3	0	50	Good	0.04
			14	36	3				0.329
ACER UM 5-68	9	100-1302	1	2	3	0	100	Good	0.018
ACER UM 8-32	4	100-1297	4	19	3	0	90	Good	0.141
ACER UM 7-44	2	100-1295	4	24	3	0	90	Good	0.16
ACER UM 6-46	6	100-1299	4	17	3	0	80	Good	0.144
ACER UM 8-16	5	100-1298	2	16	3	0	90	2 touching	0.17
			15	78	3				0.633			Snails
Totals			29	114	3	0	86		0.962			52
CYCLE 4 END
Tile Name	Location	Photo #	Corals	Polyps	Zoox Score	Algae	CCA	Health	Area (cm^2)	Clean Time (sec)
ACER BU 14-45	10	100-1561	4	10	3	0		2 touching	0.114	179
ACER BU 13-14	3	100-1554	4	19	3	0		Good	0.134	131
ACER BU 14-47	8	100-1559	2	14	3	0		1 dead	0.134	88
ACER BU 9-42	1	100-1552	1	7	3	0		1 dead	0.048	95
ACER BU 11-11	7	100-1558	2	7	3	0		1 ok	0.059	107
			13	57	3				0.489	600
ACER UM 5-68	9	100-1560	1	2	3	0		Good	0.024	149
ACER UM 8-32	4	100-1555	4	23	3	0		Good	0.257	117
ACER UM 7-44	2	100-1553	4	27	3	0		2 touching	0.262	160
ACER UM 6-46	6	100-1557	4	22	3	0		Good	0.232	99
ACER UM 8-16	5	100-1556	2	21	3	0		Chimera	0.297	77
			15	95	3				1.072	602		Snails
Totals			28	152	3	0			1.561	1202		50

## Sheet: Batillaria 3(I)
CYCLE 4 START
Tile Name	Location	Photo #	Corals	Polyps	Zoox Score	Algae	CCA	Health	Area (cm^2)
ACER BU 9-38	8	100-1311	4	16	3	0	100	1 ok	0.126
ACER BU 13-20	4	100-1307	2	8	3	0	100	1 dead, 1 ok	0.099
ACER BU 12-21	5	100-1308	3	12	3	0	100	1 dead, 1 ok	0.09
ACER BU 12-31	7	100-1310	3	12	3	0	100	Good	0.062
ACER BU 14-16	6	100-1309	3	15	3	0	100	Good	0.141
			15	63	3				0.518
ACER UM 8-46	1	100-1304	4	19	3	0	100	Good	0.129
ACER UM 6-40	2	100-1305	1	10	3	0	100	Good	0.136
ACER UM 5-69	3	100-1306	1	1	3	0	100	2 dead, 1 ok	0.003
ACER UM 6-31	9	100-1312	3	22	3	0	100	Good	0.135
ACER UM 7-39	10	100-1313	3	13	3	0	100	1 ok	0.116
			12	65	3				0.519			Snails
Totals			27	128	3	0	100		1.037			43
CYCLE 4 END
Tile Name	Location	Photo #	Corals	Polyps	Zoox Score	Algae	CCA	Health	Area (cm^2)	Clean Time
ACER BU 9-38	8	100-1479	4	26	3	0		Good	0.184	93
ACER BU 13-20	4	100-1475	2	11	3	0		Good	0.186	107
ACER BU 12-21	5	100-1476	3	15	3	0		Good	0.129	136
ACER BU 12-31	7	100-1478	2	10	3	0		1 dead	0.072	92
ACER BU 14-16	6	100-1477	3	29	3	0		Good	0.298	117
			14	91	3				0.869	545
ACER UM 8-46	1	100-1472	4	29	3	0		Good	0.299	110
ACER UM 6-40	2	100-1473	1	16	3	0		Good	0.238	50
ACER UM 5-69	3	100-1474	0	0		0		All dead	0	0
ACER UM 6-31	9	100-1480	3	21	3	0		2 touching	0.178	119
ACER UM 7-39	10	100-1481	3	18	3	0		1 ok	0.191	151
			11	84	3				0.906	430		Snails
Totals			25	175	3	0			1.775	975		38
